# Supplementary material for: KiSS-1 Modulation by Epigenetic Agents Improves the Cisplatin Sensitivity of Lung Cancer Cells
Source: MDPI journal article supplement (doi:10.3390/ijms25095048), 2024-05-06
Supplement: s1 [file s1]

## Supplementary material

### KiSS-1 modulation by epigenetic agents improves cisplatin sensitivity of lung cancer cells

Giovanni Luca Beretta<sup>1,\*</sup>, Desirè Alampi<sup>1</sup>, Cristina Corno<sup>1</sup>, Nives Carenini<sup>1</sup>, Elisabetta Corna<sup>1</sup> and Paola Perego<sup>1,\*</sup>

<sup>1</sup> Molecular Pharmacology Unit, Department of Experimental Oncology, Fondazione IRCCS Istituto Nazionale dei Tumori, 20133 Milan, Italy; [giovanni.beretta@istitutotumori.mi.it](mailto:giovanni.beretta@istitutotumori.mi.it), [dmalampi@gmail.com](mailto:dmalampi@gmail.com), [cristina.corno@istitutotumori.mi.it](mailto:cristina.corno@istitutotumori.mi.it), [nives.carenini@istitutotumori.mi.it](mailto:nives.carenini@istitutotumori.mi.it), [elisabetta.corna@istitutotumori.mi.it](mailto:elisabetta.corna@istitutotumori.mi.it), [paola.perego@istitutotumori.mi.it](mailto:paola.perego@istitutotumori.mi.it)

\* Correspondence: [paola.perego@istitutotumori.mi.it](mailto:paola.perego@istitutotumori.mi.it) (PP); [giovanni.beretta@istitutotumori.mi.it](mailto:giovanni.beretta@istitutotumori.mi.it) (GLB)

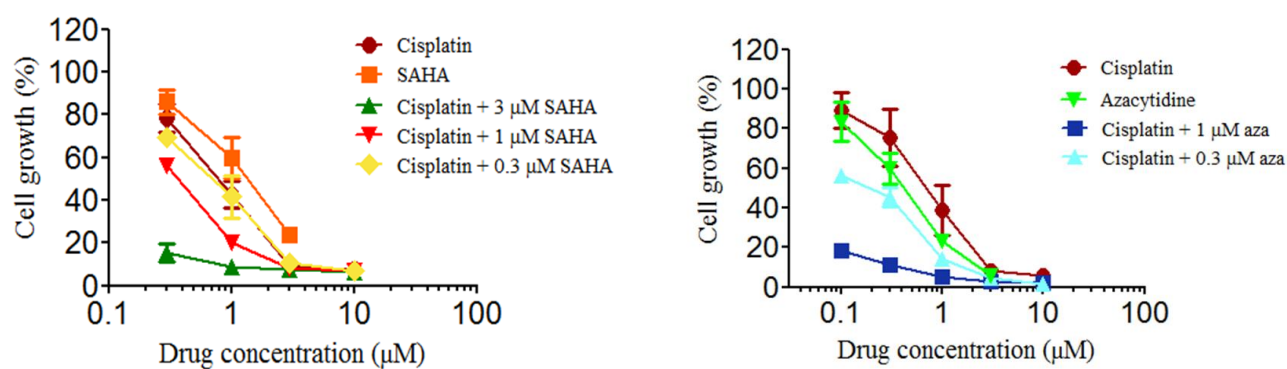

**Figure S1. Cell sensitivity of H460 cells in the simultaneous treatment schedule with SAHA or AZA.** Cell sensitivity was evaluated through cell growth inhibition assay. Cells were treated for 72 h with SAHA or AZA in simultaneous combination with cisplatin. After 72 h cells were counted with cell counter. The values reported in the graph represent the means of three experiments and the corresponding standard deviations.

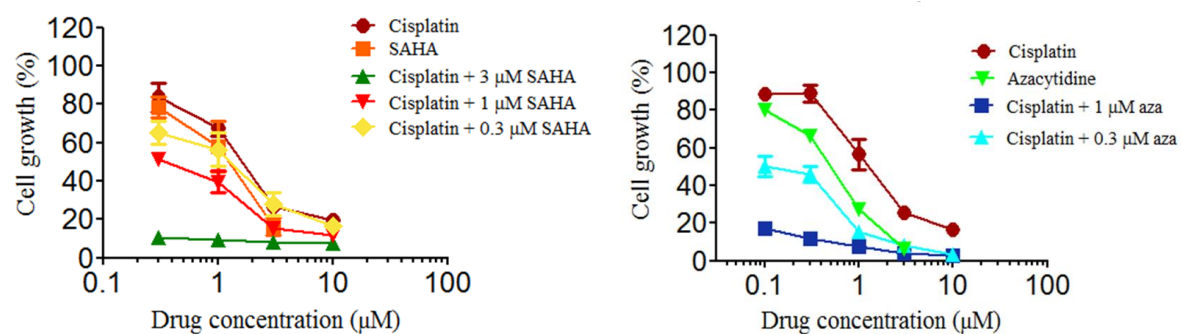

**Figure S2. Cell sensitivity of H460 cells in the pre-incubation treatment schedule with SAHA and AZA.** Cell sensitivity was evaluated through cell growth inhibition assay. Cells were treated for 24 h with SAHA or AZA, cells were co-incubated with cisplatin. After 48 h cells were counted with an automated cell counter. The values reported in the graph represent the means of three experiments and the corresponding standard deviations.

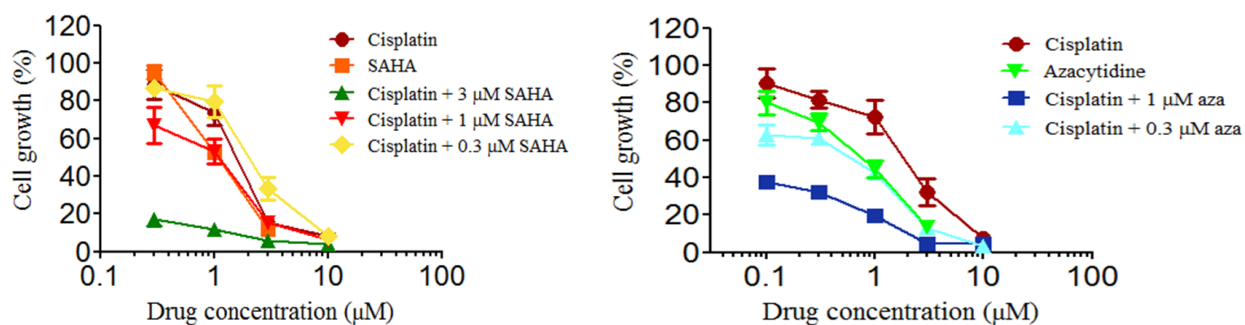

**Figure S3. Cell sensitivity of H460/Pt cells in the simultaneous treatment schedule with SAHA and AZA.**

Cell sensitivity was evaluated through cell growth inhibition assay. Cells were treated for 72 h with SAHA or AZA in simultaneous combination with cisplatin. After 72 h cells were counted with an automated cell counter. The values reported in the graph represent the means of three experiments and the corresponding standard deviations.

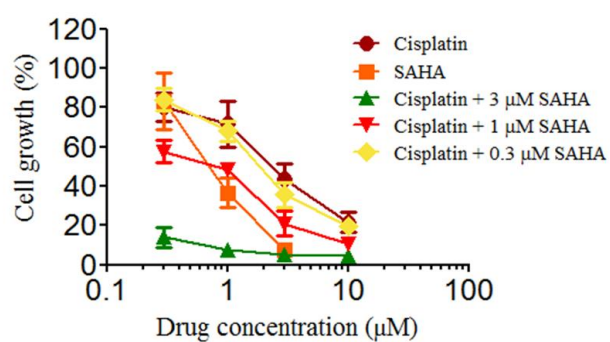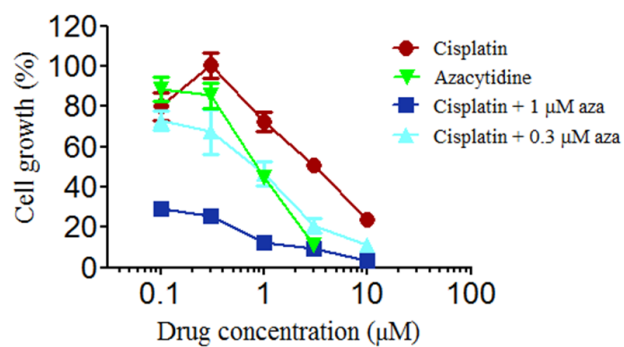

**Figure S4. Cell sensitivity of H460/Pt cells in the pre-incubation treatment schedule with SAHA and AZA.** Cell sensitivity was evaluated through cell growth inhibition assay. Cells were treated for 24 h with SAHA or AZA, cells were co-incubated with cisplatin. After 48 h cells were counted with an automated cell counter. The values reported in the graph represent the means of three experiments and the corresponding standard deviations.

**Table S1. Heat map recapitulating the combination indexes reported in Table 2, 3, 4, 5 <sup>a</sup>**

**Table 2**

| Cisplatin   | 0.1 $\mu$ M | 0.3 $\mu$ M | 1 $\mu$ M | 3 $\mu$ M | 10 $\mu$ M |
|-------------|-------------|-------------|-----------|-----------|------------|
| SAHA        |             |             |           |           |            |
| 0.3 $\mu$ M | -           | 1,32        | 1,15      | 0,67      | 1,44       |
| 1 $\mu$ M   | -           | 1,52        | 0,68      | 0,56      | 1,56       |
| 3 $\mu$ M   | -           | 0,71        | 0,58      | 0,82      | 1,46       |
| AZA         |             |             |           |           |            |
| 0.3 $\mu$ M | 0,98        | 1,02        | 0,49      | 0,44      | 0,51       |
| 1 $\mu$ M   | 0,79        | 0,58        | 0,38      | 0,39      | 0,91       |

**Table 3**

| Cisplatin   | 0.1 $\mu$ M | 0.3 $\mu$ M | 1 $\mu$ M | 3 $\mu$ M | 10 $\mu$ M |
|-------------|-------------|-------------|-----------|-----------|------------|
| SAHA        |             |             |           |           |            |
| 0.3 $\mu$ M | -           | 0,98        | 1,44      | 0,81      | 1,06       |
| 1 $\mu$ M   | -           | 1,41        | 1,27      | 0,56      | 0,83       |
| 3 $\mu$ M   | -           | 0,65        | 0,63      | 0,63      | 0,82       |
| AZA         |             |             |           |           |            |
| 0.3 $\mu$ M | 0,83        | 0,83        | 0,3       | 0,26      | 0,22       |
| 1 $\mu$ M   | 0,71        | 0,49        | 0,36      | 0,25      | 0,27       |

**Table 4**

| Cisplatin   | 0.1 $\mu$ M | 0.3 $\mu$ M | 1 $\mu$ M | 3 $\mu$ M | 10 $\mu$ M |
|-------------|-------------|-------------|-----------|-----------|------------|
| SAHA        |             |             |           |           |            |
| 0.3 $\mu$ M | -           | 1,42        | 2,34      | 1,42      | 1,33       |
| 1 $\mu$ M   | -           | 1,39        | 1,31      | 1,37      | 1,42       |
| 3 $\mu$ M   | -           | 1,45        | 1,24      | 1,07      | 1,39       |
| AZA         |             |             |           |           |            |
| 0.3 $\mu$ M | 1,11        | 1,48        | 0,97      | 0,46      | 0,42       |
| 1 $\mu$ M   | 1,06        | 0,96        | 0,64      | 0,23      | 0,58       |

**Table 5**

| Cisplatin   | 0.1 $\mu$ M | 0.3 $\mu$ M | 1 $\mu$ M | 3 $\mu$ M | 10 $\mu$ M |
|-------------|-------------|-------------|-----------|-----------|------------|
| SAHA        |             |             |           |           |            |
| 0.3 $\mu$ M | -           | 4,56        | 2,18      | 1,01      | 1,15       |
| 1 $\mu$ M   | -           | 2,67        | 2,03      | 1,02      | 0,81       |
| 3 $\mu$ M   | -           | 1,79        | 1,16      | 0,92      | 0,94       |
| AZA         |             |             |           |           |            |
| 0.3 $\mu$ M | 1,06        | 1,62        | 0,64      | 0,3       | 0,27       |
| 1 $\mu$ M   | 0,65        | 0,59        | 0,32      | 0,28      | 0,16       |

<sup>a</sup> CI lower than 0.85–0.90 indicate synergistic drug interactions (green). CI values higher than 1.20–1.45 indicate antagonism (red) CI between 0.91-1.19 reflect additive activity (orange). The methodology is described in Materials and Methods section.

Table S2. Heat map recapitulating the Western blot quantification of Figure 1<sup>a</sup>

| H460 (Figure 1A)         |            |             |             |
|--------------------------|------------|-------------|-------------|
| #                        | p53        | Bax         | Bcl2        |
| Control                  | 1          | 1           | 1           |
| 3μM SAHA                 | 58,5328814 | 6,372439185 | 3,715862454 |
| 1μM SAHA                 | 2,61841805 | 5,048594113 | 1,447191908 |
| 0.3μM SAHA               | 13,9062163 | 2,1596332   | 1,95808765  |
| 3μM Cisplatin            | 40,0134762 | 2,921091073 | 0,933653424 |
| 3μM SAHA+3μM Cisplatin   | 15,6661694 | 6,999680074 | 0,97187535  |
| 1μM SAHA+3μM Cisplatin   | 51,7923945 | 5,692568851 | 2,004082825 |
| 0.3μM SAHA+3μM Cisplatin | 36,3119577 | 2,504923191 | 2,864747257 |

| H460 (Figure 1A)        |            |            |             |
|-------------------------|------------|------------|-------------|
| #                       | p53        | Bax        | Bcl2        |
| Control                 | 1          | 1          | 1           |
| 1μM AZA                 | 2,37857272 | 1,82600992 | 1,386508977 |
| 0.3μM AZA               | 1,94897223 | 1,0384375  | 1,294442138 |
| 0.1μM AZA               | 0,3946025  | 1,00001171 | 0,809567944 |
| 3μM Cisplatin           | 3,07964428 | 10,0176381 | 3,06064735  |
| 1μM AZA+3μM Cisplatin   | 4,60095277 | 8,19930144 | 1,29999986  |
| 0.3μM AZA+3μM Cisplatin | 4,66567565 | 7,14074466 | 1,537262006 |
| 0.1μM AZA+3μM Cisplatin | 2,8277553  | 9,02964459 | 1,255867925 |

| H460/Pt (Figure 1B)       |            |            |            |
|---------------------------|------------|------------|------------|
| #                         | p53        | Bax        | Bcl2       |
| Control                   | 1          | 1          | 1          |
| 3μM SAHA                  | 9,11749713 | 0,77156442 | 1,89947515 |
| 1μM SAHA                  | 5,10360426 | 1,3219479  | 3,04993431 |
| 0.3μM SAHA                | 5,36244705 | 1,92642309 | 1,74857312 |
| 10μM Cisplatin            | 49,494183  | 10,5052529 | 1,33415774 |
| 3μM SAHA+10μM Cisplatin   | 20,7621825 | 2,74383789 | 0,8802923  |
| 1μM SAHA+10μM Cisplatin   | 22,5218164 | 4,74848692 | 1,05606563 |
| 0.3μM SAHA+10μM Cisplatin | 28,4356092 | 11,2671701 | 1,55092809 |

| H460/Pt (Figure 1B)      |           |           |           |
|--------------------------|-----------|-----------|-----------|
| #                        | p53       | Bax       | Bcl2      |
| Control                  | 1         | 1         | 1         |
| 1μM AZA                  | 1,5703189 | 1,0956618 | 0,9504123 |
| 0.3μM AZA                | 0,6172014 | 0,4337637 | 0,7497884 |
| 0.1μM AZA                | 2,6994968 | 0,7475805 | 1,3994632 |
| 10μM Cisplatin           | 11,277251 | 4,9517075 | 1,1457491 |
| 1μM AZA+10μM Cisplatin   | 16,544136 | 5,6671084 | 0,8990518 |
| 0.3μM AZA+10μM Cisplatin | 16,053612 | 5,5261492 | 1,2097208 |
| 0.1μM AZA+10μM Cisplatin | 16,342217 | 4,5159713 | 1,0960267 |

<sup>a</sup>The band intensity was quantified by using Image Studio Lite Ver.5.2 (LICOR Biosciences). Each band intensity of selected protein (e.g., p53, Bax, Bcl2) was divided to the band intensity of the corresponding actin. The values of treated samples were then normalized to the corresponding control untreated samples. The heat map has been generated using excel program (green>1 (increased expression); red<1 (reduced expression)).
